# Supplementary material for: A review of the global epidemiology of scrub typhus
Source: PubMed Central journal article supplement (PMC5687757; doi:10.1371/journal.pntd.0006062), 2017-11-03
Supplement: pntd.0006062.s002.pdf [file pntd.0006062.s002.pdf]

**S1 Table. Reported Human Scrub Typhus Cases without Seroprevalence or Outbreak**

| <b>Region/Country</b> | <b>Reported by</b>                                                                        | <b>Case #</b> |
|-----------------------|-------------------------------------------------------------------------------------------|---------------|
| Cambodia              | (Corwin, Soeprapto et al. 1997; Chheng, Carter et al. 2013)                               | Multiple      |
| Cameroon <sup>1</sup> | (Ghorbani, Ghorbani et al. 1997)                                                          | 1             |
| Chile                 | (Balcells, Rabagliati et al. 2011; Weitzel, Dittrich et al. 2016)                         | 4             |
| Djibouti              | (Horton, Jiang et al. 2016)                                                               | 3             |
| Micronesia            | (Durand, Kuartei et al. 2004)                                                             |               |
| Myanmar (Burma)       | (Sayen, Pond et al. 1946; Audy 1947; Parola, Miller et al. 2003)                          |               |
| Pakistan              | (Shirai and Wisseman 1975)                                                                | 2             |
| PR Congo              | (Osuga, Kimura et al. 1991)                                                               | 1             |
| Russia                | (Tarasevich, Kulagin et al. 1968)                                                         |               |
| Tajikistan            | (Kulagin, Tarasevic et al. 1968)                                                          |               |
| Tanzania              | (Groen, Nur et al. 1999)                                                                  |               |
| the Philippines       | (Errington, King et al. 1946; Philip, Woodward et al. 1946; Woodward, Philip et al. 1946) |               |
| Vanuatu               | (Miles, Austin et al. 1981)                                                               |               |

1. This case could not be confirmed by the researcher (Ghorbani, Ghorbani et al. 1997)
